# Supplementary material for: NewLeishmania donovaninucleoside hydrolase inhibitors from Brazilian flora
Source: Royal Society of Chemistry journal article supplement (doi:10.1039/c9ra02382h), 2019-01-01
Supplement: c9ra02382h1.pdf [file c9ra02382h1.pdf]

## Supporting Information

### **New *Leishmania donovani* nucleoside hydrolase inhibitors from Brazilian flora.**

Charlotte Nirma,<sup>a</sup> Gregorio Torres Rangel,<sup>a</sup> Marina Amaral Alves,<sup>a,b</sup> Livia Marques Casanova,<sup>a</sup> Mayara Monteiro Moreira,<sup>a</sup> Luanna Monteiro Rodrigues,<sup>a</sup> Lidilhone Hamerski<sup>a</sup> and Luzineide Wanderley Tinoco\*<sup>a</sup>

<sup>a</sup> Universidade Federal do Rio de Janeiro, Instituto de Pesquisas de Produtos Naturais, Centro de Ciências da Saúde, 21941-902 Rio de Janeiro, RJ, Brasil

<sup>b</sup> Universidade Federal do Rio de Janeiro, Laboratório de Avaliação e Síntese de Substâncias Bioativas, Centro de Ciências da Saúde, 21941-902 Rio de Janeiro, RJ, Brasil

### **Table of contents**

|                                                                                                                      |   |
|----------------------------------------------------------------------------------------------------------------------|---|
| <b>Figure S1.</b> Result of biological screening of 214 plants crude extracts. ....                                  | 2 |
| <b>Figure S2.</b> NMR spectra of kaempferol 3-O-β-D-xylopyranosyl-(1→2)-α-L-rhamnopyranoside ( <b>2</b> ). ....      | 3 |
| <b>Figure S3.</b> HSQC NMR spectrum of tricetin-4'-O-methyl flavone ( <b>3</b> ). ....                               | 4 |
| <b>Figure S4.</b> IC <sub>50</sub> curves and values for compounds <b>1</b> (A), <b>2</b> (B) and <b>3</b> (C). .... | 5 |

## Supporting Information

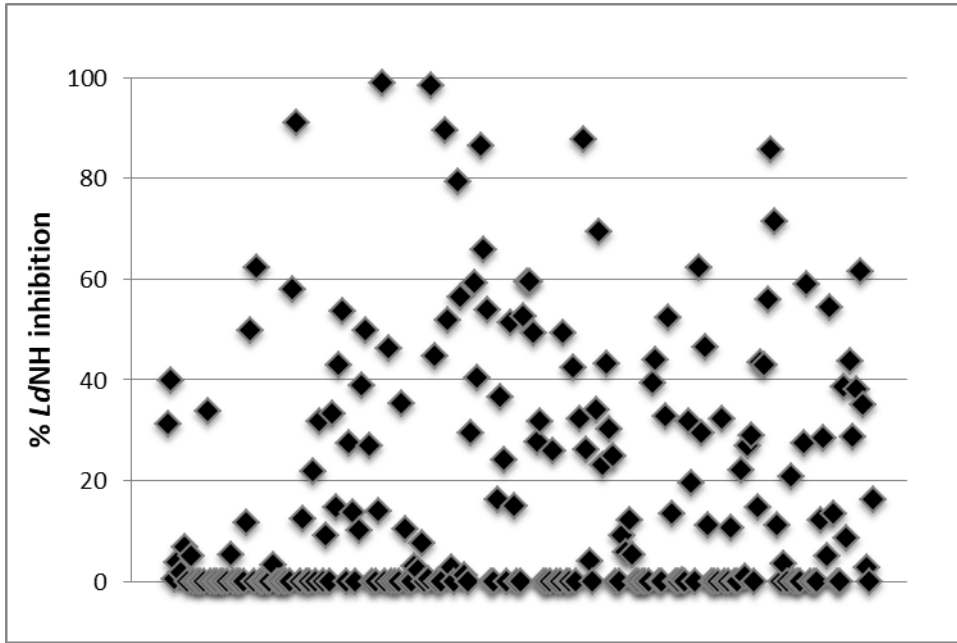

**Figure S1.** Result of biological screening of 214 plants crude extracts. (Each point on this graph corresponds to the result of a bioassay of one crude extract).

## Supporting Information

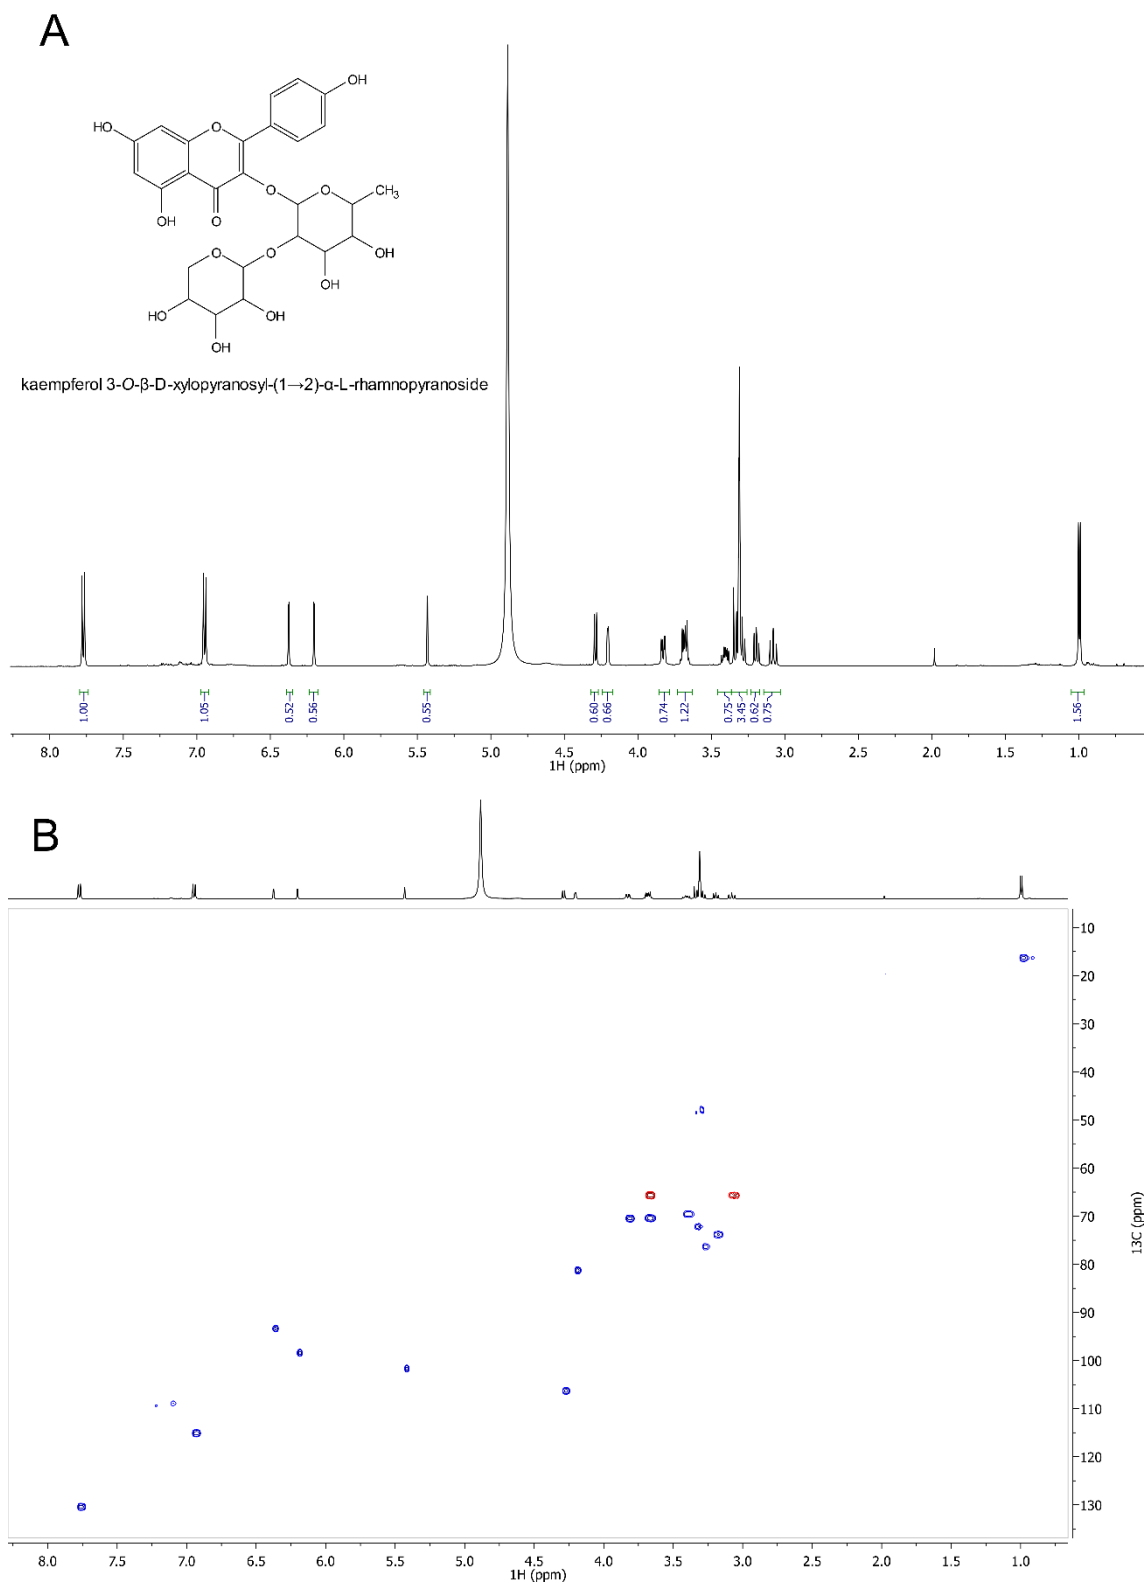

**Figure S2.** NMR spectra of kaempferol 3-O- $\beta$ -D-xylopyranosyl-(1 $\rightarrow$ 2)- $\alpha$ -L-rhamnopyranoside (**2**). A)  $^1\text{H}$ ; B) HSQC.

## Supporting Information

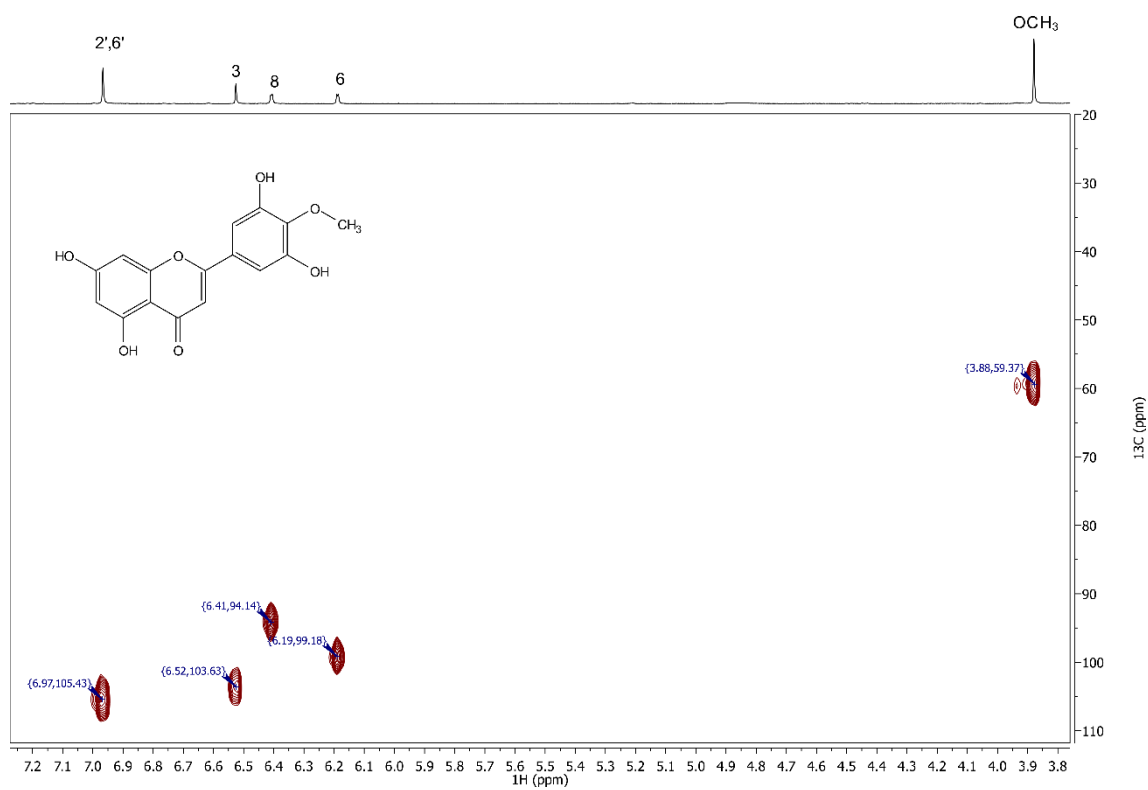

**Figure S3.** HSQC NMR spectrum of tricetin-4'-O-methyl flavone (3).

## Supporting Information

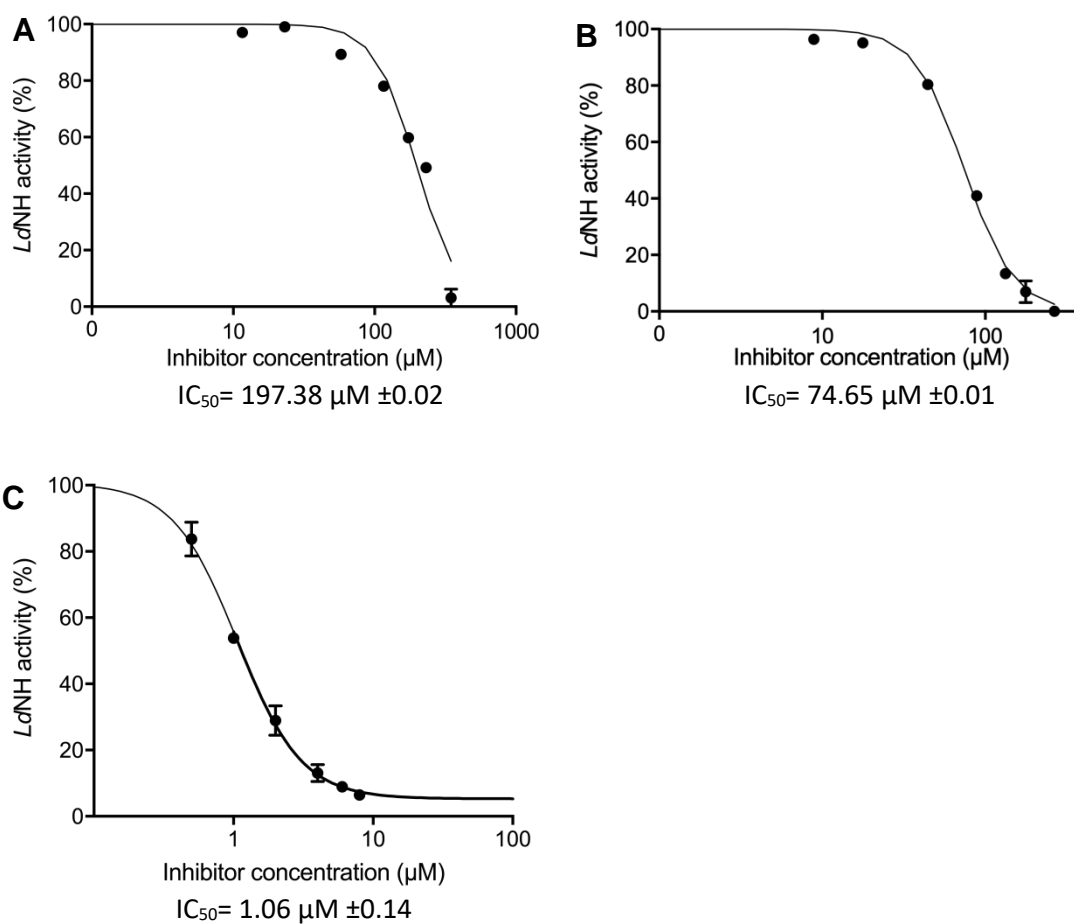

**Figure S4.**  $IC_{50}$  curves and values for compounds **1** (A), **2** (B) and **3** (C).
